# Supplementary material for: The Food Environment Around Primary Schools in a Diverse Urban Area in the Netherlands: Linking Fast-Food Density and Proximity to Neighbourhood Disadvantage and Childhood Overweight Prevalence
Source: PubMed Central journal article supplement (PMC9019046; doi:10.3389/fpubh.2022.838355), 2022-04-06
Supplement: Data_Sheet_1.pdf [file Data_Sheet_1.pdf]

## Table of Contents

|                                                                                                                                                                                |    |
|--------------------------------------------------------------------------------------------------------------------------------------------------------------------------------|----|
| Table S1 – Background data of The Hague per sub-district .....                                                                                                                 | 2  |
| Figure S1 – The Hague districts .....                                                                                                                                          | 4  |
| Figure S2 – Grillrooms and kebab shops, take-away restaurants and fast-food restaurants around primary schools in the district Escamp .....                                    | 5  |
| Figure S3 – Grillrooms and kebab shops, take-away restaurants and fast-food restaurants around primary schools in the district Haagse Hout and two adjacent sub-districts..... | 6  |
| Figure S4 – Grillrooms and kebab shops, take-away restaurants and fast-food restaurants around primary schools in the district Laak .....                                      | 7  |
| Figure S5 – Grillrooms and kebab shops, take-away restaurants and fast-food restaurants around primary schools in the district Leidschenveen-Ypenburg.....                     | 8  |
| Figure S6 – Grillrooms and kebab shops, take-away restaurants and fast-food restaurants around primary schools in the district Loosduinen .....                                | 9  |
| Figure S7 – Grillrooms and kebab shops, take-away restaurants and fast-food restaurants around primary schools in the district Scheveningen.....                               | 10 |
| Figure S8 – Grillrooms and kebab shops, take-away restaurants and fast-food restaurants around primary schools in the district Segbroek .....                                  | 11 |
| Figure S9 – Fast-food restaurants around primary schools in The Hague .....                                                                                                    | 12 |
| Figure S10 – Grillrooms and kebab shops around primary schools in The Hague.....                                                                                               | 13 |
| Figure S11 – Take-away restaurants around primary schools in The Hague.....                                                                                                    | 14 |

**Table S1** – Background data of The Hague per sub-district.

| Sub-district                         | Number of inhabitants (2020) | Dis-advantage Index (2015) <sup>1</sup> | % aged 0-19 (2020) | % aged 20-64 (2020) | % aged >65 (2020) | % with migration background (2020) | Childhood overweight (%) (2015) |
|--------------------------------------|------------------------------|-----------------------------------------|--------------------|---------------------|-------------------|------------------------------------|---------------------------------|
| <b>Oostduinen</b>                    |                              |                                         |                    |                     |                   |                                    |                                 |
| Belgisch Park                        | 8351                         | -9.9                                    | 21.9%              | 57.7%               | 20.5%             | 38.2%                              | 10.1                            |
| Westbroekpark en Duttendel           | 2171                         | -21.3                                   | 17.4%              | 39.9%               | 42.7%             | 34.5%                              |                                 |
| Benoordenhout                        | 14347                        | -16.9                                   | 23.5%              | 50%                 | 26.5%             | 41%                                | 7.5                             |
| Archipelbuurt                        | 6147                         | -16.2                                   | 18.6%              | 58.6%               | 22.8%             | 42.7%                              | 7.0                             |
| Van Stolkpark en Scheveningse Bosjes | 746                          | -21.2                                   | 23.3%              | 49.3%               | 27.3%             | 46.6%                              |                                 |
| Scheveningen                         | 18303                        | -6.5                                    | 18.8%              | 61.2%               | 20%               | 32.4%                              | 15.7                            |
| Duindorp                             | 5902                         | -3.7                                    | 23.3%              | 61.4%               | 15.3%             | 18.8%                              | 17.8                            |
| Geuzen- en Statenkwartier            | 13987                        | -13.6                                   | 23.5%              | 57.9%               | 18.6%             | 42.4%                              | 10.3                            |
| Zorgvliet                            | 619                          |                                         | 17.6%              | 47.2%               | 35.2%             | 46%                                |                                 |
| Duinoord                             | 8148                         | -7.7                                    | 20.2%              | 65.7%               | 14.2%             | 43.3%                              | 8.6                             |
| Bomen- en Bloemenbuurt               | 14797                        | -10.8                                   | 20.5%              | 58.5%               | 20.9%             | 32.4%                              | 10.0                            |
| Vogelwijk                            | 5343                         | -25.9                                   | 30.5%              | 48.9%               | 20.6%             | 27.6%                              | 8.3                             |
| Bohemen en Meer en Bos               | 4868                         | -11.1                                   | 12.6%              | 49.6%               | 37.8%             | 27.2%                              | 7.8                             |
| Kijkduin en Ockenburgh               | 2385                         | -19.2                                   | 18.2%              | 48.4%               | 33.3%             | 28.6%                              |                                 |
| Kraayenstein en Vroondaal            | 6808                         | -10.5                                   | 24%                | 59.2%               | 16.8%             | 30.7%                              | 12.8                            |
| Loosduinen                           | 18072                        | -7.2                                    | 20.3%              | 55.6%               | 24.1%             | 34.2%                              | 16.5                            |
| Waldeck                              | 17514                        | -5.3                                    | 16.2%              | 51.1%               | 32.7%             | 34.4%                              | 17.3                            |
| Vruchtenbuurt                        | 9875                         | -12.4                                   | 23.2%              | 60.3%               | 16.6%             | 26.9%                              | 9.0                             |
| Valkenboskwartier                    | 18508                        | 1.8                                     | 19.2%              | 70.4%               | 10.4%             | 51.4%                              | 17.2                            |
| Regentessekwartier                   | 13893                        | 4.9                                     | 17.7%              | 71.7%               | 10.6%             | 52.1%                              | 16.7                            |
| Zeeheldenkwartier                    | 12317                        | -0.1                                    | 16.3%              | 72.6%               | 11.1%             | 50.9%                              | 15.0                            |
| Willemspark                          | 1611                         | -10.5                                   | 14.7%              | 66.7%               | 18.6%             | 53.4%                              |                                 |
| Haagse Bos                           | 477                          |                                         | 5.9%               | 50.5%               | 43.6%             | 46.1%                              |                                 |
| Mariahoeve en Marlot                 | 15045                        | 2.1                                     | 18.8%              | 59.4%               | 21.8%             | 54.3%                              | 19.1                            |
| Bezuidenhout                         | 17198                        | -3.2                                    | 19%                | 68.8%               | 12.3%             | 50.9%                              | 14.5                            |
| Stationsbuurt                        | 12760                        | 10.6                                    | 18.3%              | 73.5%               | 8.2%              | 72.6%                              | 25.3                            |
| Centrum                              | 20300                        | 3.9                                     | 14%                | 73.4%               | 12.5%             | 58.8%                              | 21.2                            |
| Schildersbuurt                       | 31669                        | 16.4                                    | 27.4%              | 61.8%               | 10.8%             | 91.4%                              | 31.3                            |
| Transvaalkwartier                    | 16424                        | 16.2                                    | 26.5%              | 63.8%               | 9.7%              | 93%                                | 33.1                            |
| Rustenburg en Oostbroek              | 19116                        | 4.6                                     | 22.5%              | 69.5%               | 8%                | 67.9%                              | 25.8                            |

|                           |       |      |       |       |       |       |      |
|---------------------------|-------|------|-------|-------|-------|-------|------|
| Leyenburg                 | 15190 | -4.2 | 18.8% | 63.3% | 17.9% | 39.9% | 18.0 |
| Bouwlust en Vrederust     | 29523 | 7.5  | 26.6% | 57.8% | 15.6% | 72.4% | 29.2 |
| Morgenstond               | 20251 | 7.6  | 23.5% | 63.8% | 12.6% | 70.6% | 26.1 |
| Zuiderpark                | 117   |      |       | 32.5% | 66.7% | 28.2% |      |
| Moerwijk                  | 21504 | 12.6 | 25.9% | 63.7% | 10.4% | 76.3% | 23.7 |
| Groente- en Fruitmarkt    | 5228  | 9.9  | 28%   | 64.9% | 7.1%  | 89.6% | 29.2 |
| Laakkwartier en Spoorwijk | 43137 | 11.3 | 23.1% | 68.7% | 8.2%  | 77.7% | 27.3 |
| Binckhorst                | 2758  |      | 7.4%  | 90.8% | 1.8%  | 71.6% |      |
| Wateringse Veld           | 22393 | -6.3 | 28.8% | 60%   | 11.2% | 47.6% | 16.6 |
| Hoornwijk                 | 340   |      | 18.2% | 70.3% | 11.5% | 50.9% |      |
| Ypenburg                  | 27172 | -8.7 | 30.6% | 61.6% | 7.9%  | 43.2% | 15.2 |
| Forepark                  | 125   |      | 12.8% | 58.4% | 28.8% | 14.4% |      |
| Leidschenveen             | 20896 | -9.1 | 30.6% | 60%   | 9.3%  | 42.8% | 12.1 |

<sup>1</sup> The most recent available data was used for all variables except for the disadvantage index, because in the analyses disadvantage index data from 2015 was utilised in conjunction with data on overweight prevalence among children from 2015.

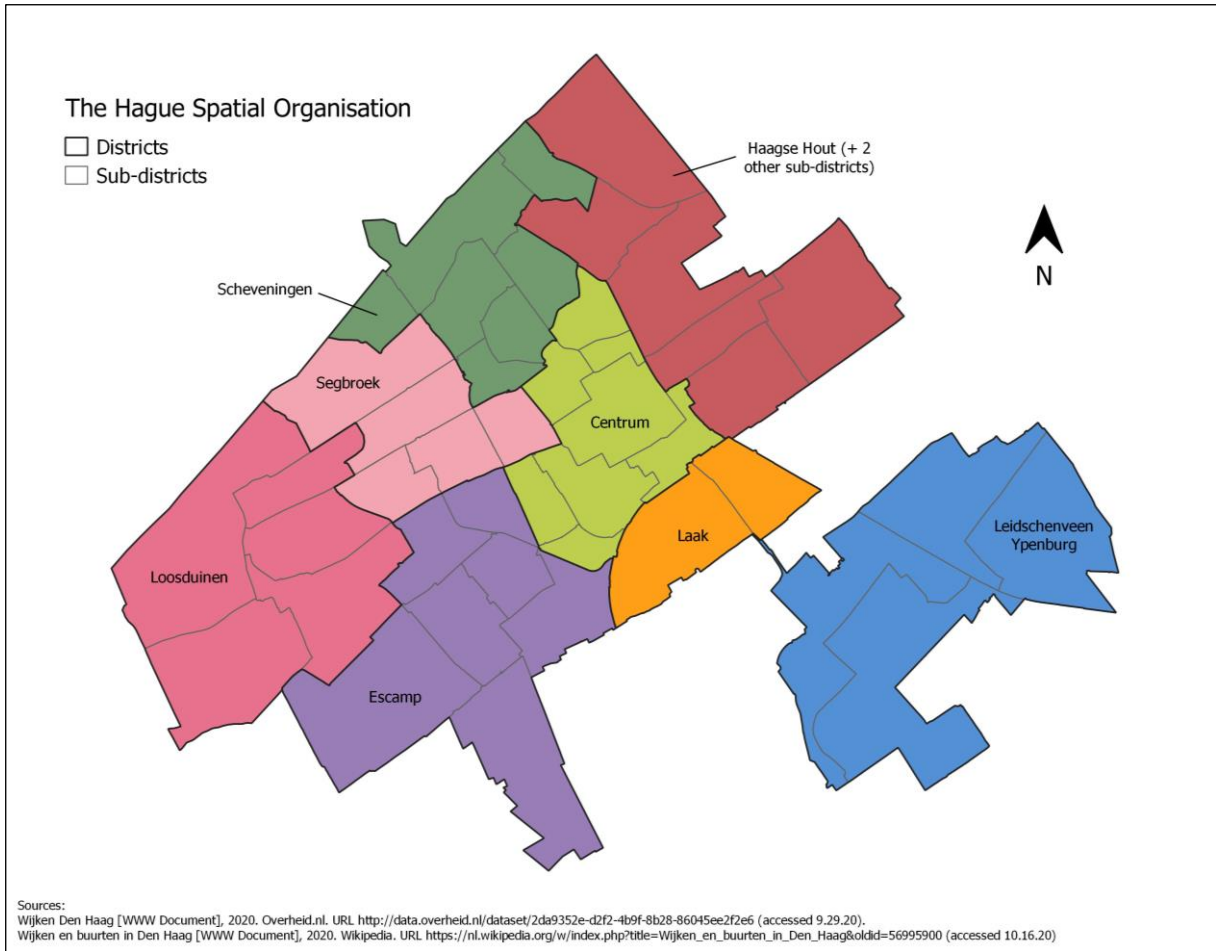

**Figure S1** – The Hague districts.

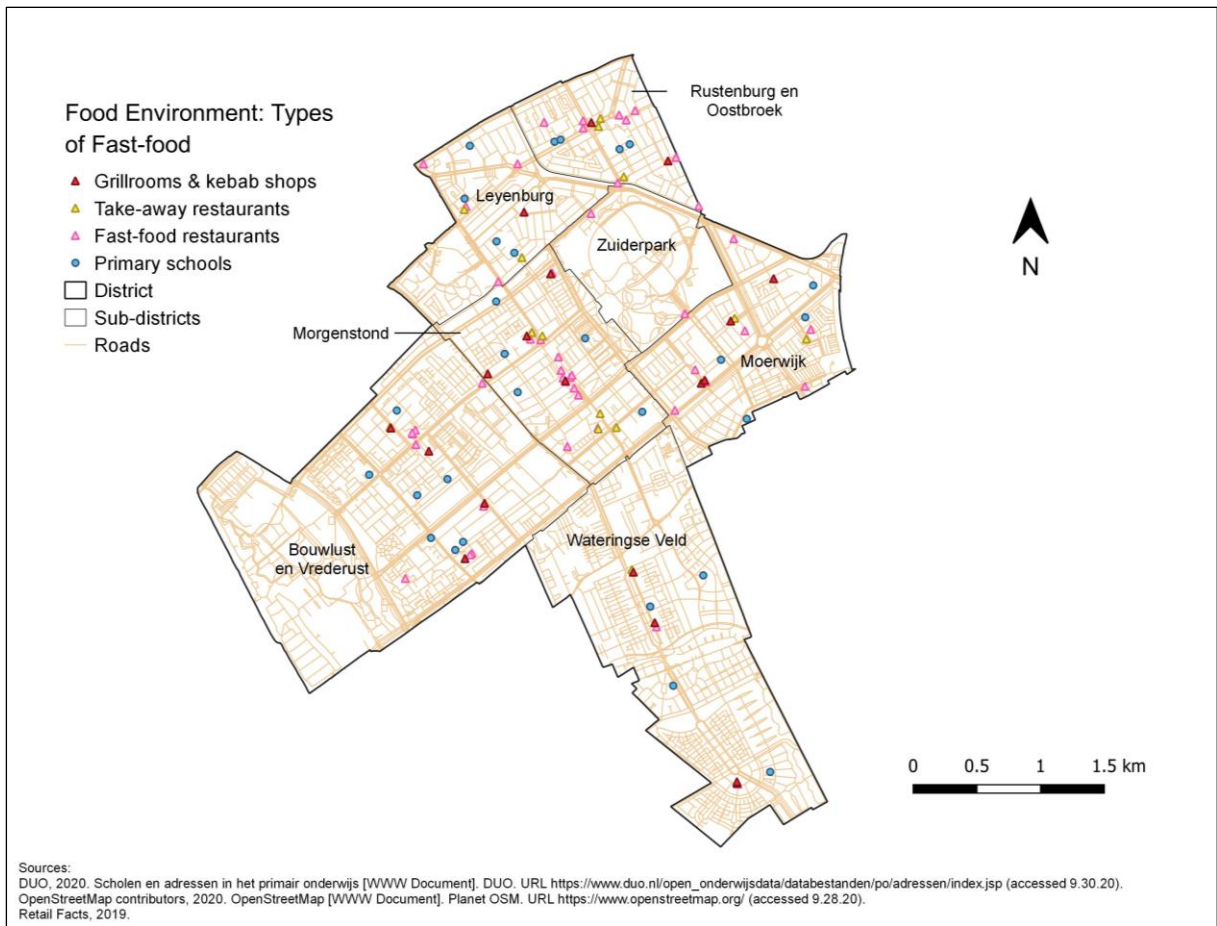

**Figure S2** – Grillrooms and kebab shops, take-away restaurants and fast-food restaurants around primary schools in the district Escamp.

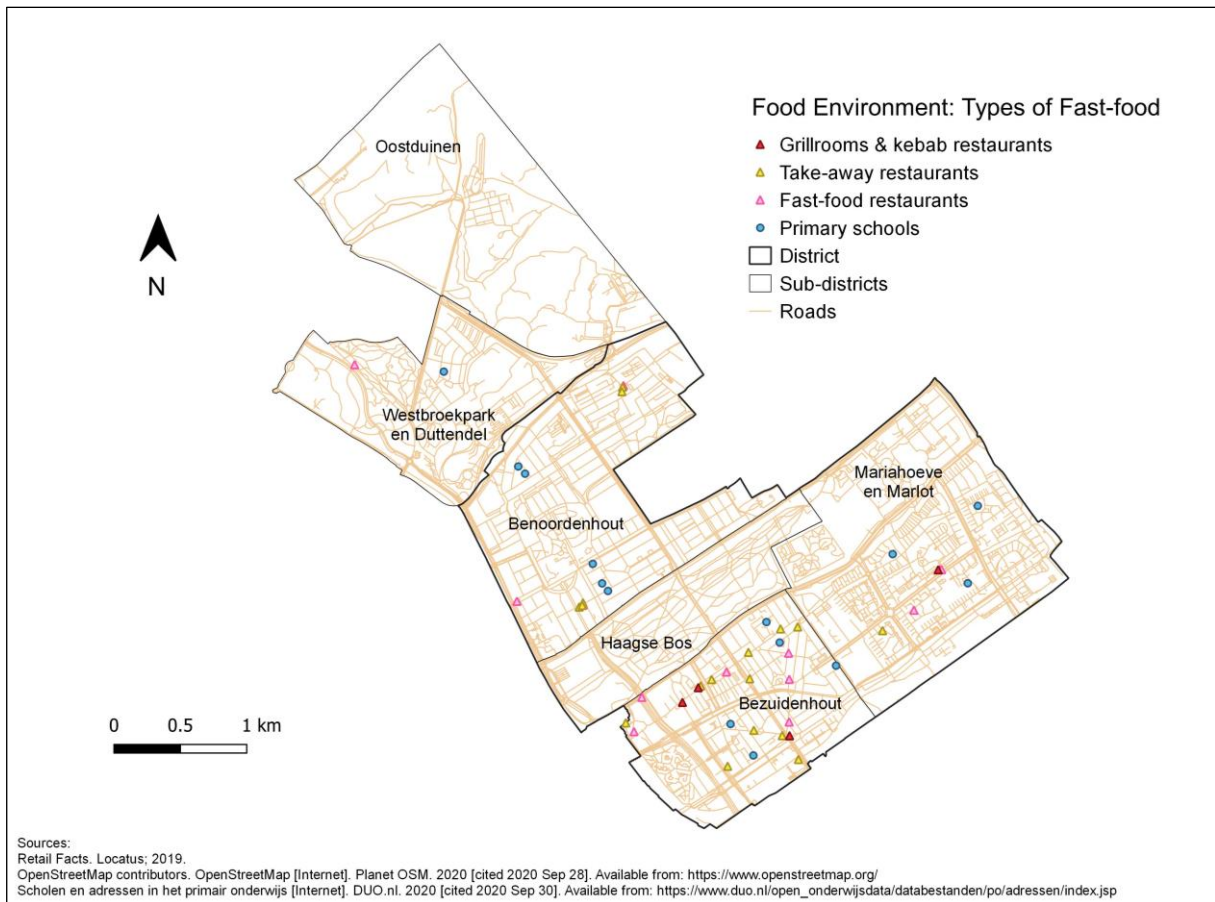

**Figure S3** – Grillrooms and kebab shops, take-away restaurants and fast-food restaurants around primary schools in the district Haagse Hout and two adjacent sub-districts.

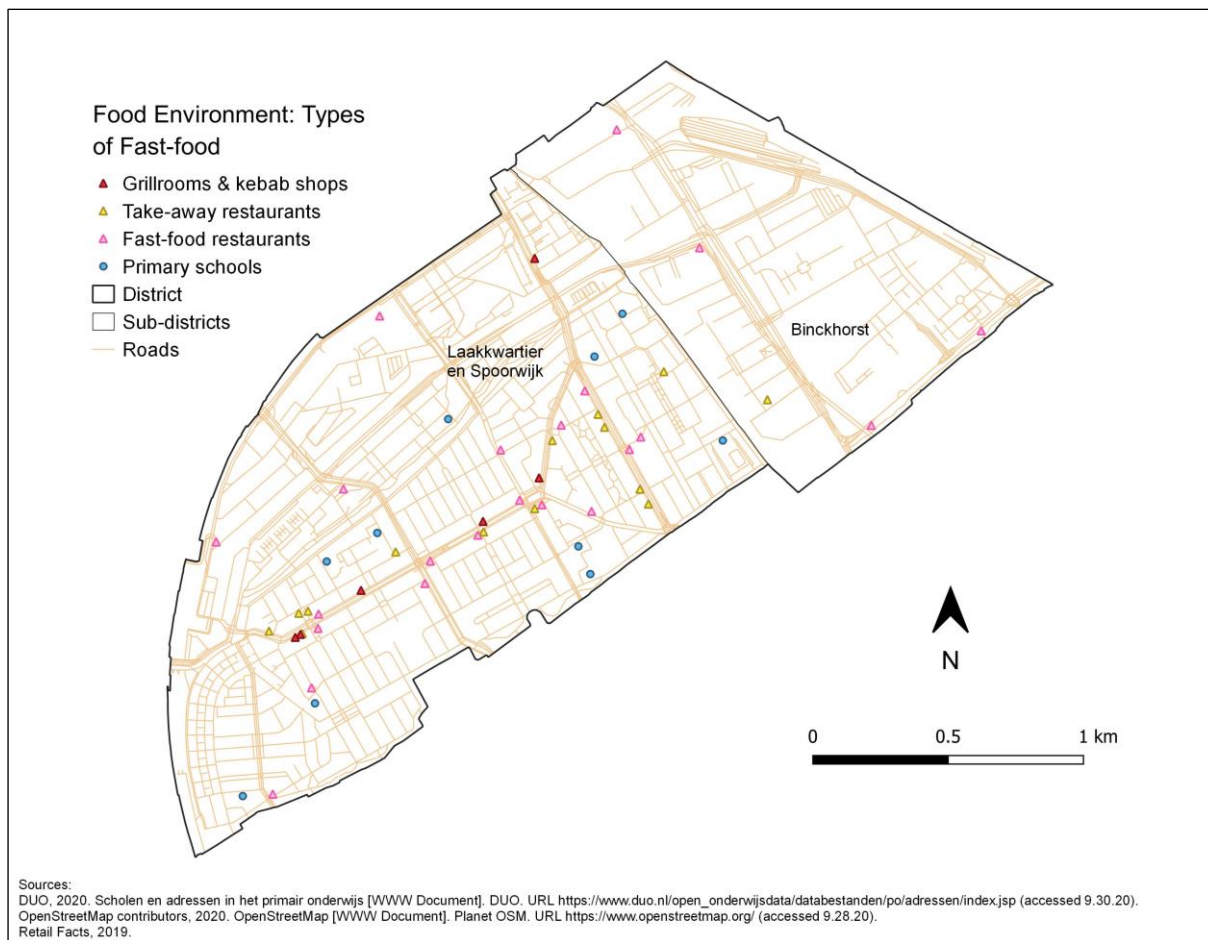

**Figure S4** – Grillrooms and kebab shops, take-away restaurants and fast-food restaurants around primary schools in the district Laak.

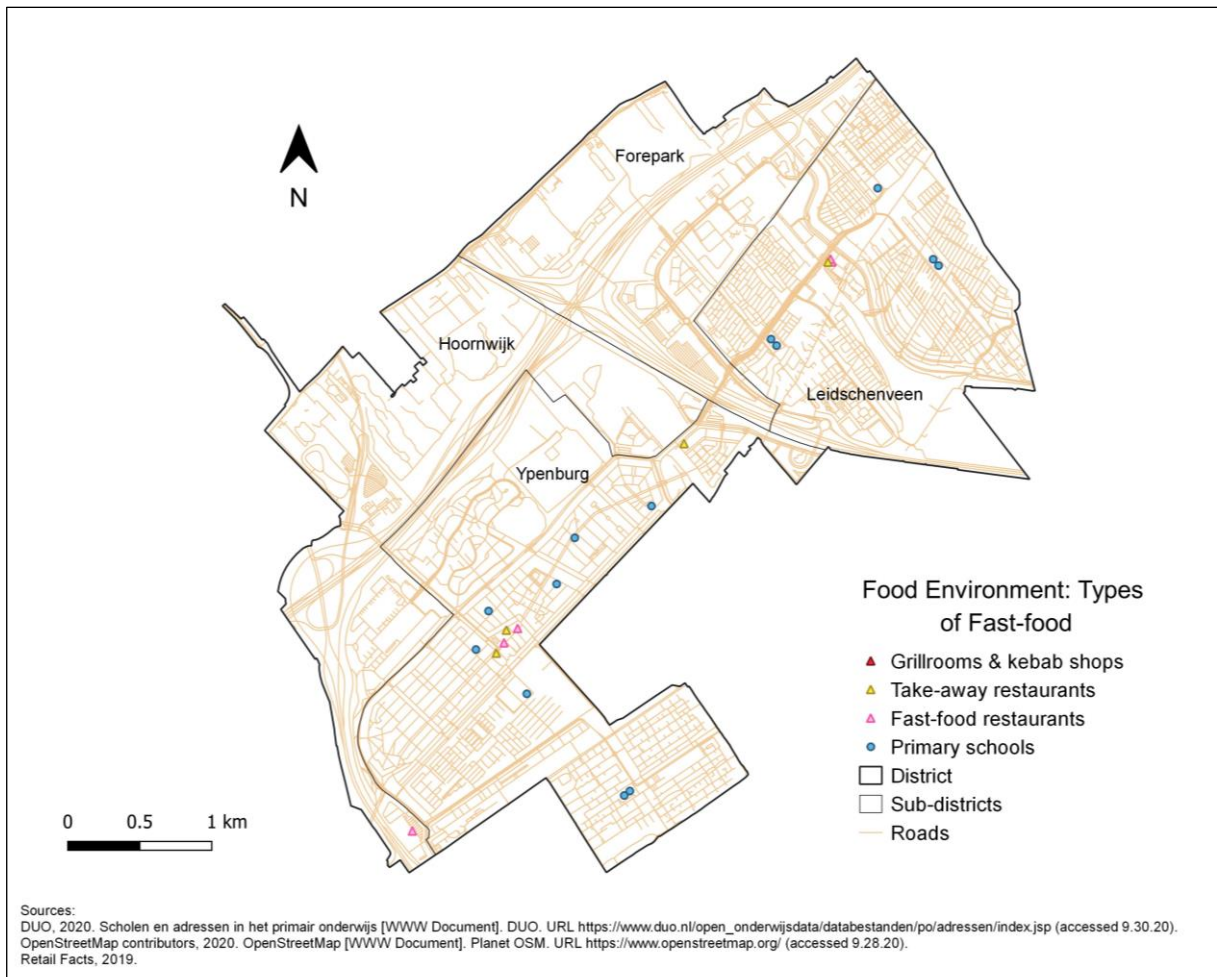

**Figure S5** – Grillrooms and kebab shops, take-away restaurants and fast-food restaurants around primary schools in the district Leidschenveen-Ypenburg.



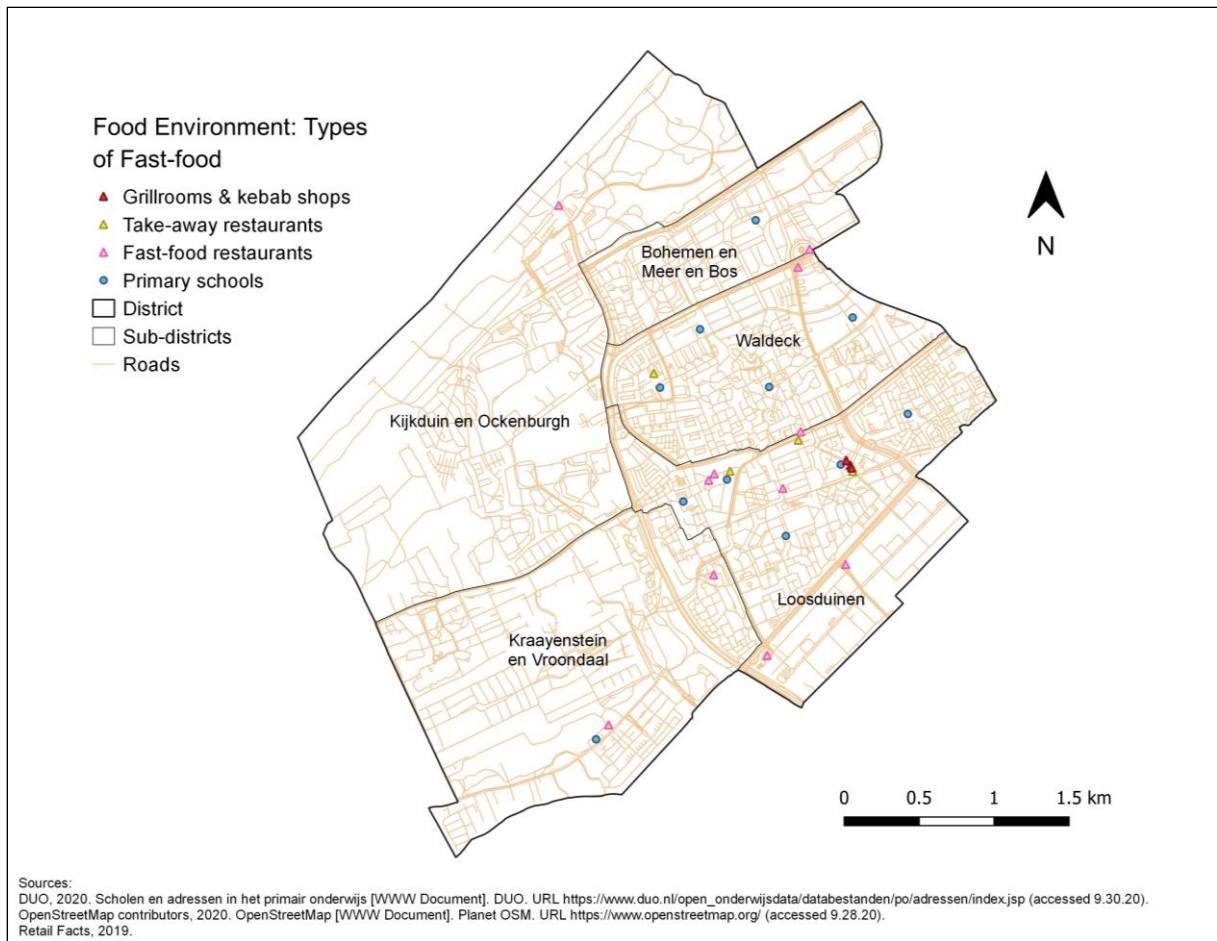

**Figure S6** – Grillrooms and kebab shops, take-away restaurants and fast-food restaurants around primary schools in the district Loosduinen.

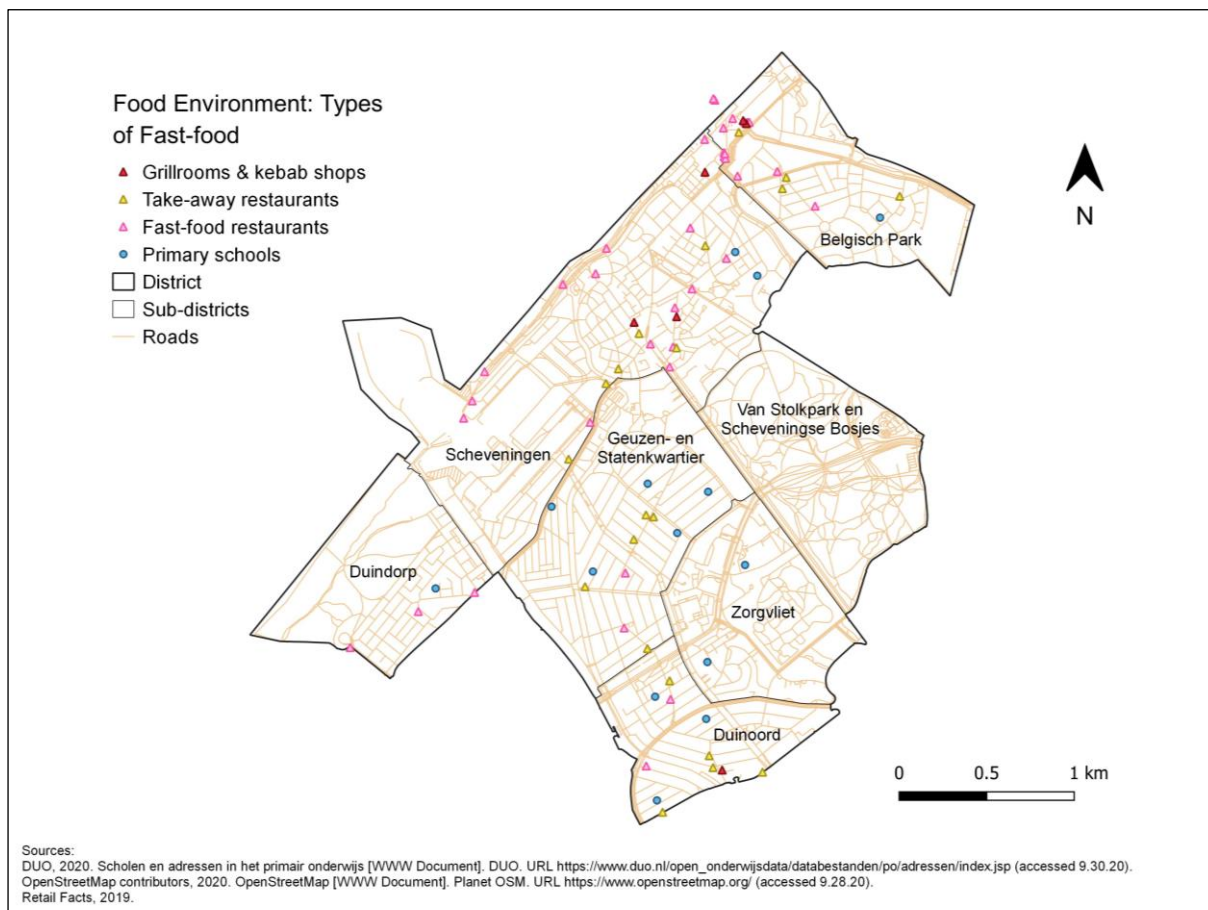

**Figure S7** – Grillrooms and kebab shops, take-away restaurants and fast-food restaurants around primary schools in the district Scheveningen.

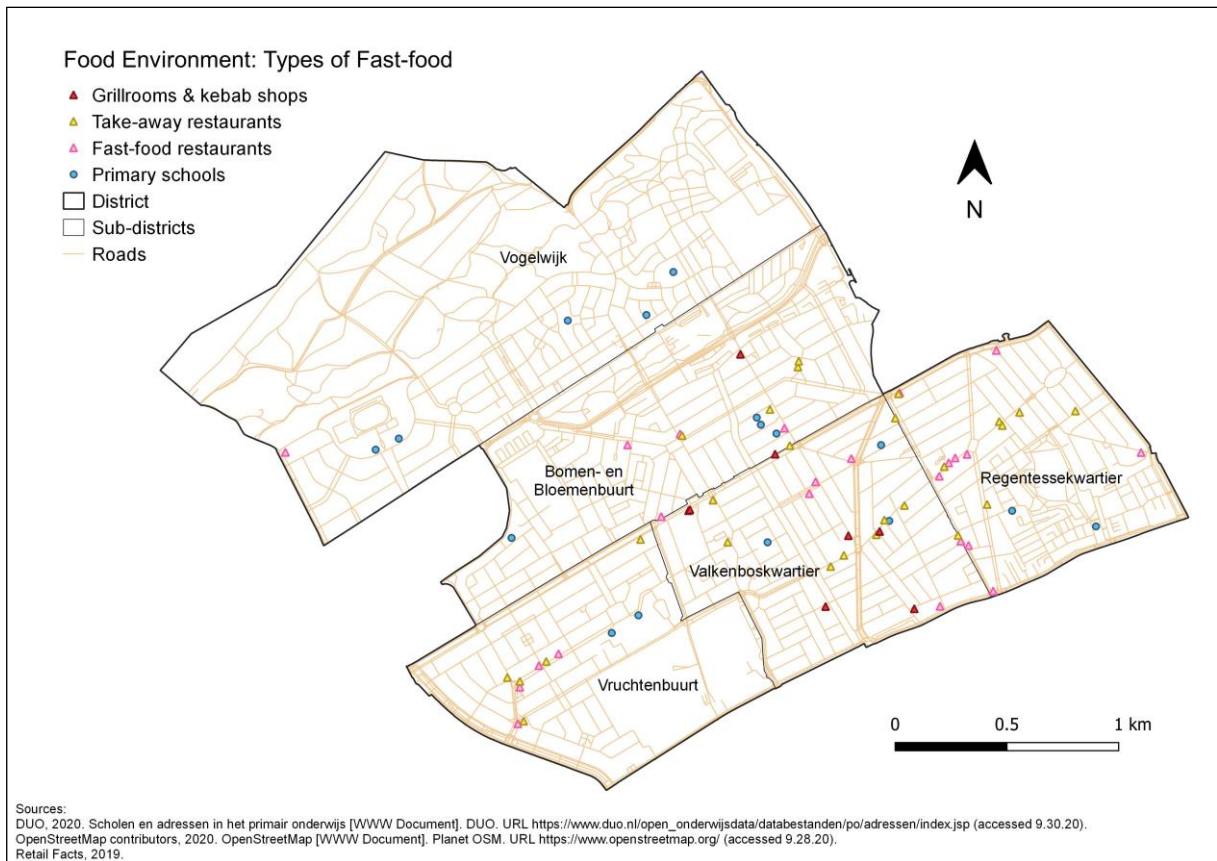

**Figure S8** – Grillrooms and kebab shops, take-away restaurants and fast-food restaurants around primary schools in the district Segbroek.

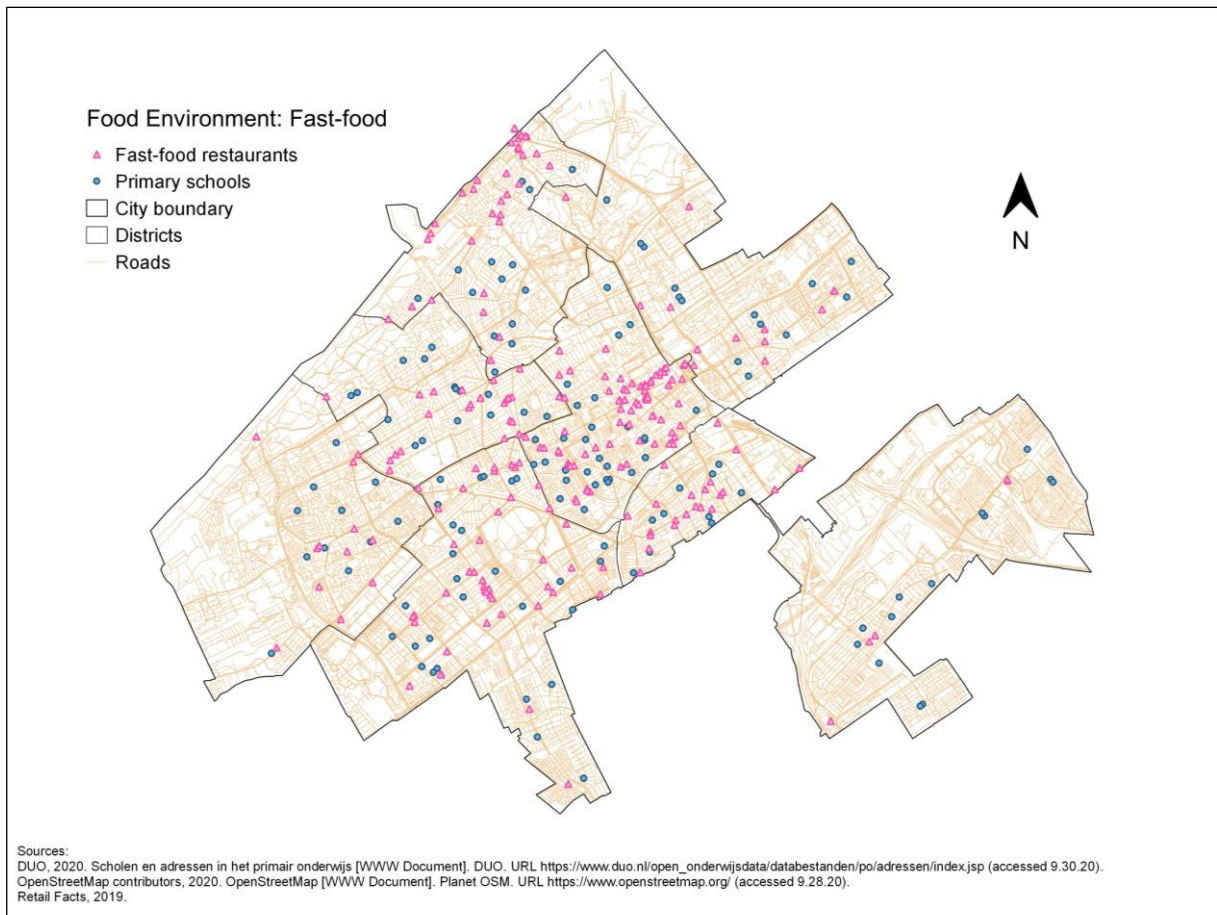

**Figure S9** – Fast-food restaurants around primary schools in The Hague.

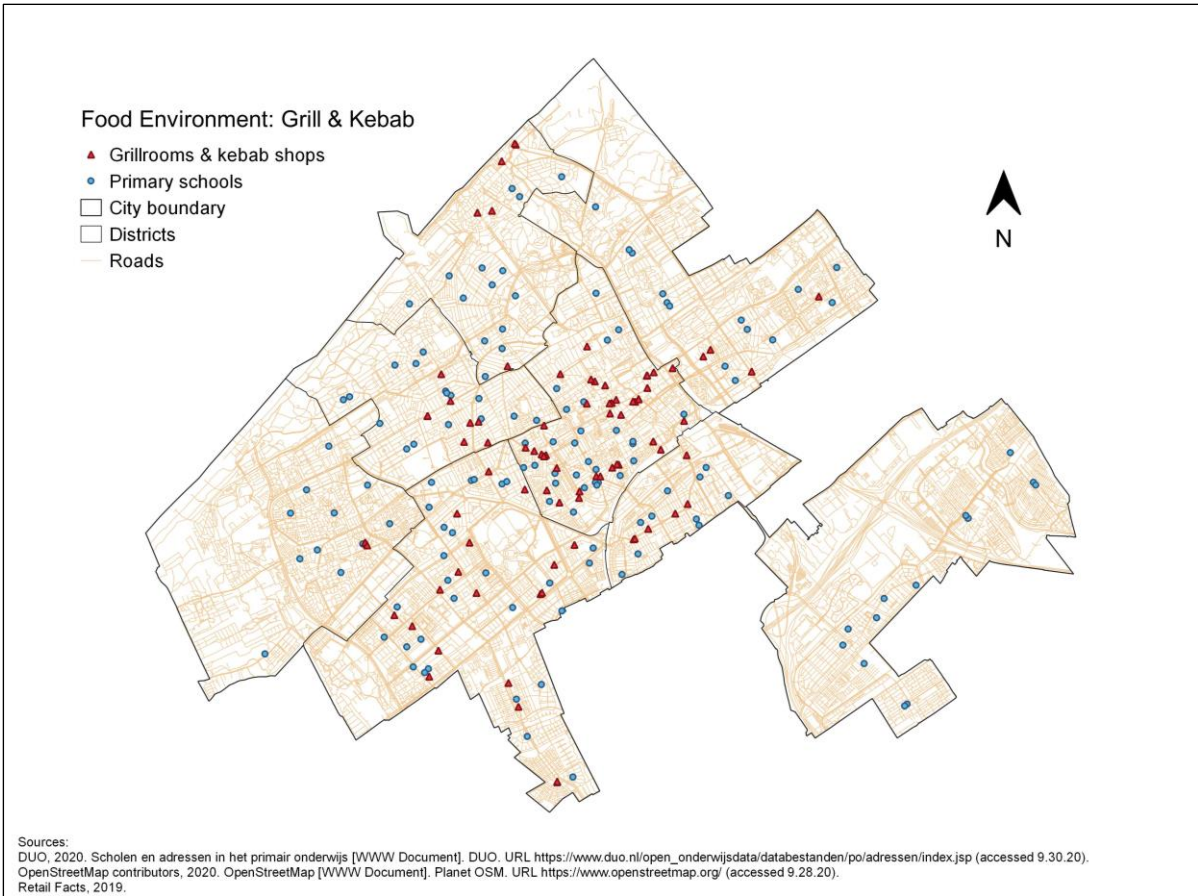

**Figure S10** – Grillrooms and kebab shops around primary schools in The Hague.

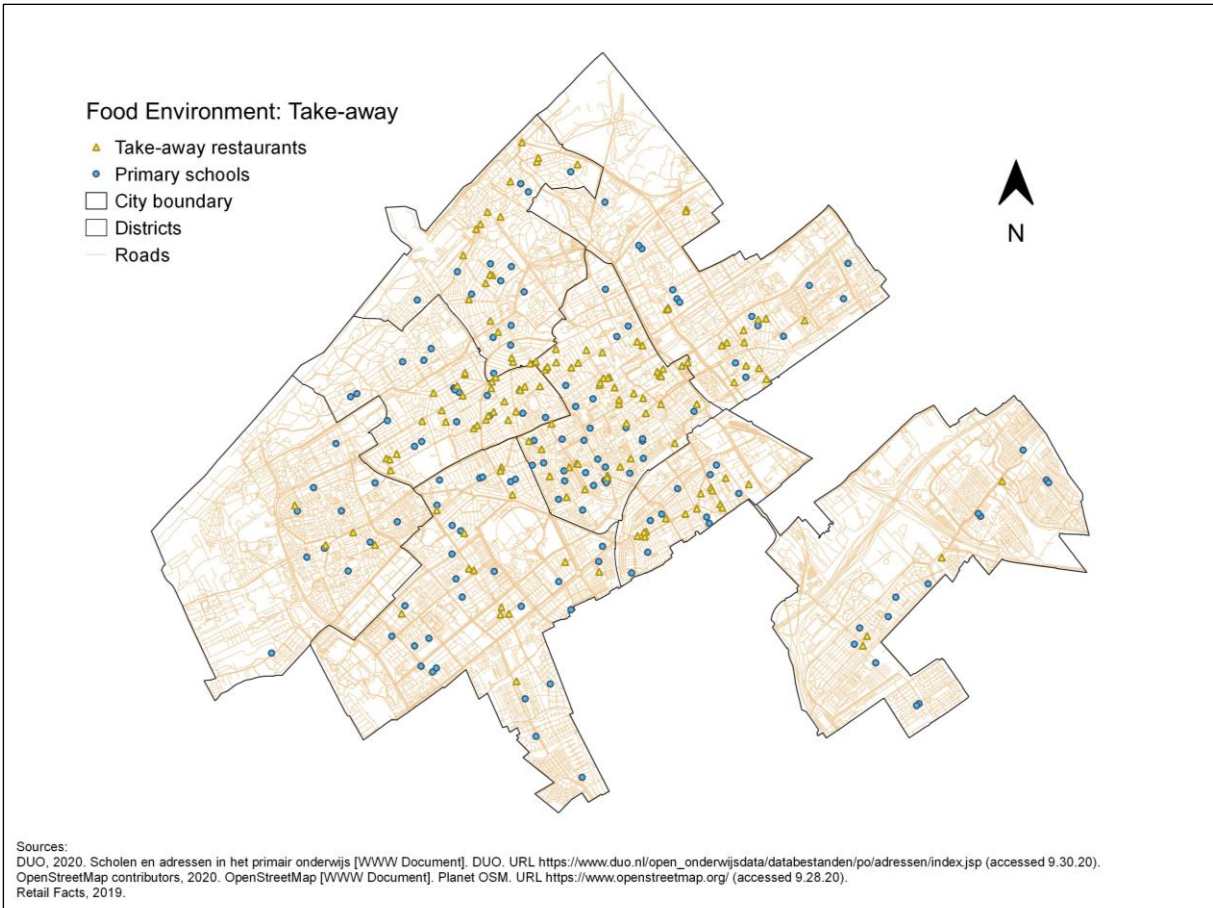

**Figure S11** – Take-away restaurants around primary schools in The Hague.
